# Supplementary material
Source: Springer Nature journal article supplement (https://www.springermedizin.de/resource/supplementary/13012_2009_169_MOESM5_ESM.pdf/9629390)

## Positive Predictive Value

## Negative Predictive Value

### Page

- Cold relief: recommend medication - must do
- should do
- should not do
- Cold relief: physician required - must not do
- must do
- should do
- should not do
- Pain relief: recommend medication - must not do
- must do
- should do
- could do
- should not do
- Pain relief: physician required - must not do
- must do
- should do
- should not do
- must not do

### Luck

- Necessary care
- Unnecessary care

### Zuckermann

- Diagnosis
- Drug name
- Drug dosage
- Drug action
- Side effects
- Other therapy
- Appointments
- Diagnostic studies

### Wilson

- Smoking (proxy=notes)
- Alcohol use (proxy=notes)
- Blood pressure (proxy=notes)
- Smoking (proxy=patient questionnaire)
- Alcohol use (proxy=patient questionnaire)
- Blood pressure (proxy=patient questionnaire)

### Ward

- Ask about smoking
- Advise to stop smoking

### Flocke

- Smoking cessation
- Exercise
- Diet
- Smoking
- Alcohol use
- Substance use
- Sun exposure
- Seatbelt use
- HIV prevention
- STD prevention

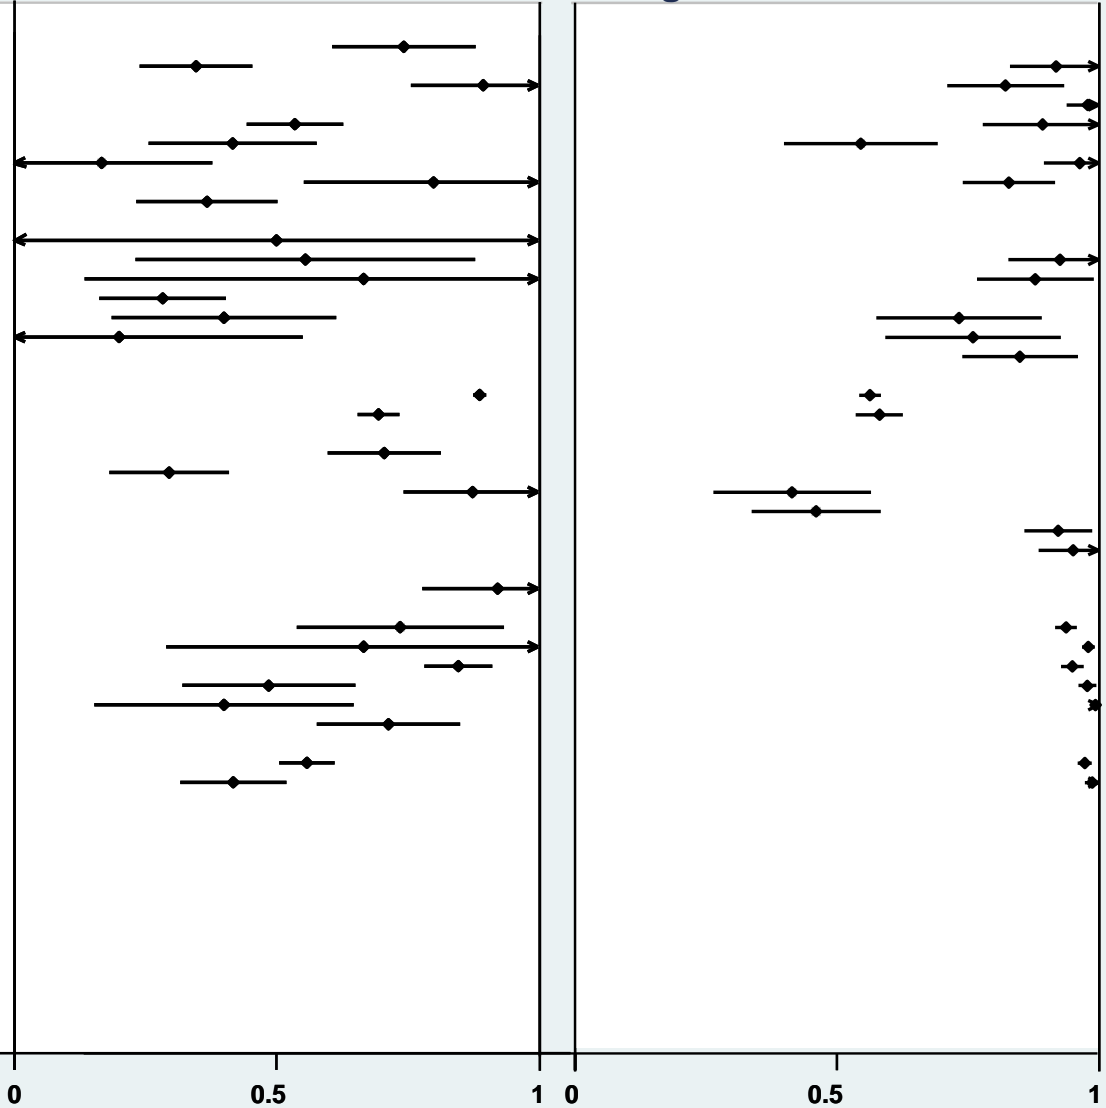

Supplement: MOESM5 [file 9629390]
